# Supplementary material for: A new heterogeneous photocatalyst based on Wells–Dawson polyoxometalate and nickel coordination compounds: synthesis, structure and property
Source: Royal Society of Chemistry journal article supplement (doi:10.1039/c4ra15932b), 2015-01-01
Supplement: c4ra15932b1.pdf [file c4ra15932b1.pdf]

## Supporting information

A new heterogeneous photocatalyst based on Wells  
-Dawson polyoxometalate and nickel coordination compounds:  
synthesis, structure and property

*Lei Zhang<sup>a</sup>, Bingqian Shan<sup>a</sup>, Hongxun Yang<sup>a,b,\*</sup>, Dongshuang Wu<sup>b</sup>, Rui Zhu<sup>a</sup>, Jianhang Nie<sup>a</sup> and  
Rong Cao<sup>b,\*</sup>*

<sup>a</sup>School of Environmental & Chemical Engineering, Jiangsu University of Science and  
Technology, Zhenjiang 212003, China, <sup>b</sup>State Key Laboratory of Structural Chemistry, Fujian  
Institute of Research on the Structure of Matter, Chinese Academy of Sciences, Fujian, Fuzhou,  
350002, China

\*Corresponding author: HongXun Yang, School of Environmental & Chemical  
Engineering, Jiangsu University of Science and Technology, Zhenjiang 212003,  
China, E-mail address: yhongxun@126.com;

\*Corresponding author: Rong Cao, <sup>b</sup>State Key Laboratory of Structural Chemistry,  
Fujian Institute of Research on the Structure of Matter, Chinese Academy of Sciences,  
Fujian, Fuzhou, 350002, China, E-mail address: rcao@fjirsm.ac.cn

Table S1. Crystal data and structure refinement for complex **NiPW**.

|                                                     | <b>NiPW</b>                                                                                                    |
|-----------------------------------------------------|----------------------------------------------------------------------------------------------------------------|
| Empirical formula                                   | C <sub>90</sub> H <sub>72</sub> N <sub>18</sub> Ni <sub>3</sub> O <sub>62</sub> P <sub>2</sub> W <sub>18</sub> |
| Formula weight                                      | 5945.03                                                                                                        |
| Crystal system                                      | Tetragonal                                                                                                     |
| Space group                                         | P4 <sub>3</sub>                                                                                                |
| <i>a</i> (Å)                                        | 18.6171(5)                                                                                                     |
| <i>b</i> (Å)                                        | 18.6171(5)                                                                                                     |
| <i>c</i> (Å)                                        | 36.5398(13)                                                                                                    |
| $\alpha$ (°)                                        | 90                                                                                                             |
| $\beta$ (°)                                         | 90                                                                                                             |
| $\gamma$ (°)                                        | 90                                                                                                             |
| Volume (Å <sup>3</sup> )                            | 12664.6(7)                                                                                                     |
| <i>Z</i>                                            | 4                                                                                                              |
| Total reflns/Unique                                 | 96109/27107                                                                                                    |
| R(int) /R(sigma)                                    | 0.0442/0.0791                                                                                                  |
| GOF                                                 | 1.139                                                                                                          |
| Final <i>R</i> indices [ <i>I</i> > 2σ( <i>I</i> )] | <i>R</i> <sub>1</sub> <sup>a</sup> = 0.0448,                                                                   |
| Indices(all data)                                   | <i>R</i> <sub>1</sub> <sup>a</sup> = 0.0484, <i>wR</i> <sub>2</sub> <sup>b</sup> =0.1016                       |

<sup>a</sup>  $R_1 = \frac{\sum ||F_0| - |Fc||}{\sum |F_0|}$ . <sup>b</sup>  $wR_2 = \left\{ \frac{\sum [w(F_0^2 - F_c^2)^2]}{\sum [w(F_0^2)]} \right\}^{1/2}$

**Table S2. Selected bond lengths [Å] and angles [°] for complex NiPW.**

|             |           |             |           |             |           |
|-------------|-----------|-------------|-----------|-------------|-----------|
| W(1)-O(10)  | 1.746(13) | W(7)-O(1)   | 1.691(11) | W(13)-O(19) | 1.673(11) |
| W(1)-O(49)  | 1.883(11) | W(7)-O(32)  | 1.900(10) | W(13)-O(55) | 1.906(13) |
| W(1)-O(60)  | 1.898(12) | W(7)-O(41)  | 1.901(12) | W(13)-O(43) | 1.924(11) |
| W(1)-O(42)  | 1.938(11) | W(7)-O(28)  | 1.902(12) | W(13)-O(54) | 1.930(11) |
| W(1)-O(20)  | 1.975(11) | W(7)-O(29)  | 1.927(11) | W(13)-O(36) | 1.931(11) |
| W(1)-O(8)   | 2.390(11) | W(7)-O(62)  | 2.382(9)  | W(13)-O(50) | 2.376(12) |
| W(2)-O(46)  | 1.686(12) | W(8)-O(12)  | 1.698(11) | W(14)-O(4)  | 1.696(12) |
| W(2)-O(15)  | 1.873(12) | W(8)-O(37)  | 1.898(12) | W(14)-O(59) | 1.862(11) |
| W(2)-O(45)  | 1.904(11) | W(8)-O(32)  | 1.902(11) | W(14)-O(35) | 1.898(12) |
| W(2)-O(44)  | 1.910(11) | W(8)-O(45)  | 1.939(11) | W(14)-O(15) | 1.943(12) |
| W(2)-O(57)  | 1.936(13) | W(8)-O(49)  | 1.944(11) | W(14)-O(60) | 1.979(11) |
| W(2)-O(13)  | 2.353(10) | W(8)-O(13)  | 2.394(10) | W(14)-O(8)  | 2.356(10) |
| W(3)-O(58)  | 1.711(11) | W(9)-O(30)  | 1.693(12) | W(15)-O(17) | 1.731(11) |
| W(3)-O(16)  | 1.889(12) | W(9)-O(23)  | 1.884(12) | W(15)-O(53) | 1.877(11) |
| W(3)-O(34)  | 1.892(12) | W(9)-O(18)  | 1.909(12) | W(15)-O(39) | 1.888(11) |
| W(3)-O(56)  | 1.902(11) | W(9)-O(52)  | 1.910(12) | W(15)-O(51) | 1.935(11) |
| W(3)-O(33)  | 1.955(13) | W(9)-O(48)  | 1.911(11) | W(15)-O(18) | 1.944(12) |
| W(3)-O(14)  | 2.329(9)  | W(9)-O(38)  | 2.394(11) | W(15)-O(2)  | 2.370(11) |
| W(4)-O(3)   | 1.693(12) | W(10)-O(31) | 1.715(12) | W(16)-O(6)  | 1.710(12) |
| W(4)-O(48)  | 1.885(11) | W(10)-O(26) | 1.841(12) | W(16)-O(43) | 1.874(12) |
| W(4)-O(16)  | 1.899(12) | W(10)-O(28) | 1.907(12) | W(16)-O(44) | 1.900(11) |
| W(4)-O(61)  | 1.924(12) | W(10)-O(23) | 1.923(11) | W(16)-O(34) | 1.917(12) |
| W(4)-O(27)  | 1.927(10) | W(10)-O(22) | 1.957(12) | W(16)-O(59) | 1.986(11) |
| W(4)-O(24)  | 2.398(10) | W(10)-O(38) | 2.356(11) | W(16)-O(14) | 2.399(10) |
| W(5)-O(25)  | 1.716(13) | W(11)-O(11) | 1.721(12) | W(17)-O(7)  | 1.698(12) |
| W(5)-O(20)  | 1.873(11) | W(11)-O(57) | 1.869(13) | W(17)-O(22) | 1.891(12) |
| W(5)-O(37)  | 1.892(12) | W(11)-O(55) | 1.887(12) | W(17)-O(51) | 1.916(12) |
| W(5)-O(61)  | 1.913(12) | W(11)-O(41) | 1.920(12) | W(17)-O(29) | 1.916(11) |
| W(5)-O(26)  | 1.949(11) | W(11)-O(40) | 1.986(11) | W(17)-O(47) | 1.927(13) |
| W(5)-O(24)  | 2.351(10) | W(11)-O(62) | 2.366(10) | W(17)-O(2)  | 2.386(10) |
| W(6)-O(5)   | 1.713(11) | W(12)-O(9)  | 1.703(12) | W(18)-O(21) | 1.705(12) |
| W(6)-O(33)  | 1.844(13) | W(12)-O(40) | 1.856(12) | W(18)-O(27) | 1.900(11) |
| W(6)-O(52)  | 1.884(12) | W(12)-O(36) | 1.891(11) | W(18)-O(42) | 1.930(12) |
| W(6)-O(54)  | 1.932(12) | W(12)-O(47) | 1.910(13) | W(18)-O(56) | 1.958(11) |
| W(6)-O(39)  | 1.945(10) | W(12)-O(53) | 1.920(10) | W(18)-O(35) | 1.964(12) |
| W(6)-O(50)  | 2.324(11) | W(12)-O(2)  | 2.383(11) | W(18)-O(8)  | 2.342(10) |
| Ni(1)-N(3)  | 2.042(14) | Ni(2)-N(12) | 2.041(16) | Ni(3)-N(2)  | 2.023(17) |
| Ni(1)-N(1)  | 2.106(17) | Ni(2)-N(7)  | 2.051(14) | Ni(3)-N(17) | 2.057(14) |
| Ni(1)-N(9)  | 2.115(16) | Ni(2)-N(5)  | 2.063(15) | Ni(3)-N(14) | 2.07(2)   |
| Ni(1)-N(15) | 2.120(15) | Ni(2)-N(16) | 2.068(14) | Ni(3)-N(13) | 2.086(16) |
| Ni(1)-N(6)  | 2.124(16) | Ni(2)-N(11) | 2.089(17) | Ni(3)-N(8)  | 2.110(18) |
| Ni(1)-N(4)  | 2.155(16) | Ni(2)-N(18) | 2.099(18) | Ni(3)-N(10) | 2.12(2)   |

---

|            |           |            |           |            |           |
|------------|-----------|------------|-----------|------------|-----------|
| P(1)-O(24) | 1.507(12) | P(1)-O(8)  | 1.631(11) | P(2)-O(62) | 1.527(10) |
| P(1)-O(13) | 1.523(11) | P(2)-O(50) | 1.551(12) | P(2)-O(38) | 1.531(13) |
| P(1)-O(14) | 1.534(10) | P(2)-O(2)  | 1.599(11) |            |           |

---

**Table S3. Distances [Å] and angles [°] about C–H···O weak interactions in NiPW.**

| D–H···A       | d(H···A) Å | d(D···A) Å | <DHA °  |
|---------------|------------|------------|---------|
| C60-H60···O25 | 2.326      | 3.128      | 144.28  |
| C79-H79···O4  | 2.474      | 3.220      | 156.73  |
| C79-H79···O59 | 2.539      | 3.196      | 127.98  |
| C61-H61···O19 | 2.616      | 3.172      | 127.584 |
| C8-H8···O42   | 2.693      | 3.342      | 151.771 |
| C20-H20···O58 | 2.564      | 3.072      | 114.721 |
| C41-H41···O25 | 2.697      | 3.272      | 142.836 |
| C71-H71···O5  | 2.249      | 2.977      | 134.63  |
| C86-H86···O7  | 2.427      | 3.188      | 138.98  |
| C17-H17···O9  | 2.342      | 3.210      | 155.09  |
| C39-H39···O9  | 2.556      | 3.004      | 116.63  |
| C73-H73···O11 | 2.531      | 3.051      | 115.64  |
| C29-H29···O11 | 2.620      | 2.978      | 103.49  |
| C81-H81···O17 | 2.70       | 3.217      | 115.34  |
| C59-H59···O18 | 2.669      | 3.200      | 117.01  |
| C37-H37···O21 | 2.351      | 2.988      | 125.53  |
| C7-H7···O3    | 2.472      | 3.217      | 137.20  |
| C68-H68···O41 | 2.563      | 3.004      | 116.63  |
| C85-H85···O45 | 2.569      | 2.987      | 107.73  |
| C44-H44···O49 | 2.599      | 3.082      | 112.85  |
| C62-H62···O54 | 2.240      | 3.084      | 150.56  |
| C66-H66···O58 | 2.316      | 3.186      | 155.53  |

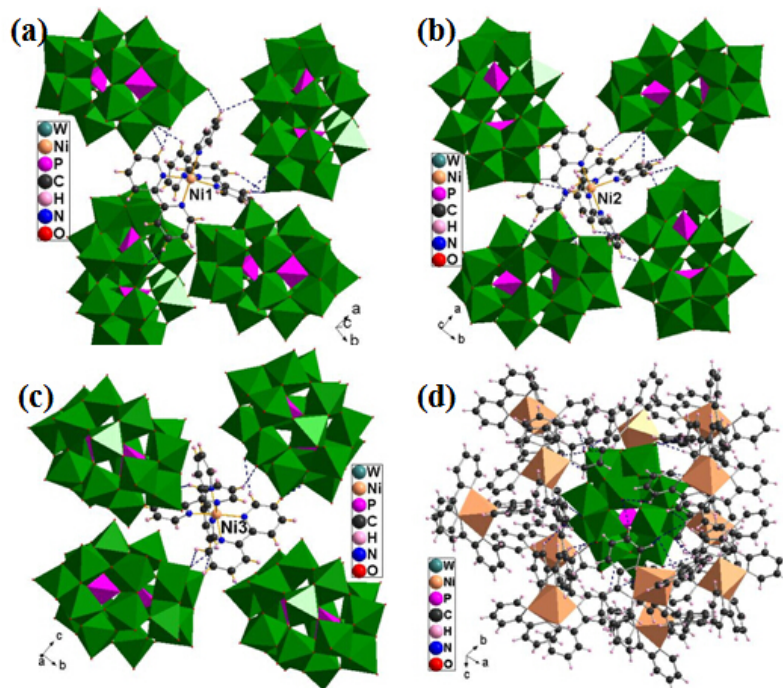

Figure S1. (a) Details of hydrogen bonding of  $[\text{Ni}1(2,2'\text{-bpy})_3]^{2+}$  in **NiPW**. (b) Details of hydrogen bonding of  $[\text{Ni}2(2,2'\text{-bpy})_3]^{2+}$  in **NiPW**. (c) Details of hydrogen bonding of  $[\text{Ni}3(2,2'\text{-bpy})_3]^{2+}$  in **NiPW**. (d) Details of Wells-Dawson hydrogen bonding in **NiPW**. Green, Purple, and Pink polyhedrons show the  $[\text{WO}_6]$ ,  $[\text{NiN}_6]$ , and  $[\text{PO}_4]$  units, respectively.

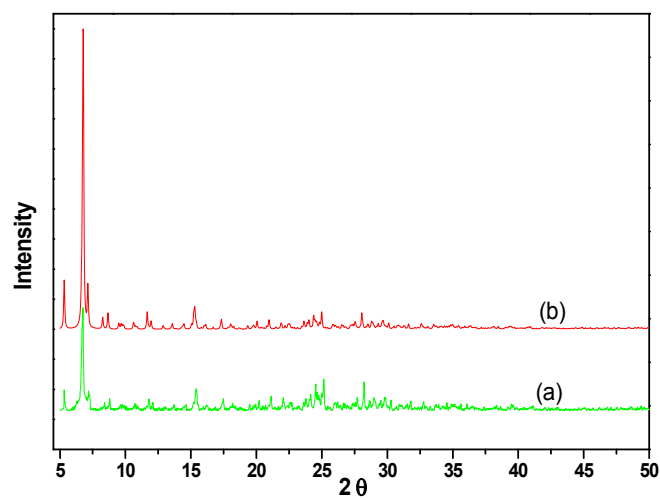

**Figure S2.** (a) Simulated and (b) Experimental XRPD patterns of complex  $[\text{Ni}(2,2'\text{-bpy})_3]_3[\text{P}_2\text{W}_{18}\text{O}_{62}]$ .
